# Supplementary material for: Stellate Trichomes in Dionaea muscipula Ellis (Venus Flytrap) Traps, Structure and Functions
Source: MDPI journal article supplement (doi:10.3390/ijms24010553), 2022-12-29

**Supplementary material Figure S1.** The trichome head cell viability test and the Control reactions of the immunolabeling of the cell wall components that were detected in the trichomes. (A) Trichome head cell viability test in an immature trap, bar 20  $\mu\text{m}$ . (B) Trichome head cell viability test in an immature trap, bar 20  $\mu\text{m}$ . (C) Control reactions of the immunolabeling of the cell wall components that were detected in a young trichome, bar 20  $\mu\text{m}$ . (D) A scheme of structure of the young trichome. (E) Control reactions of the immunolabeling of the cell wall components that were detected in a mature trichome, bar 20  $\mu\text{m}$ . (F) A scheme of structure of the mature trichome.

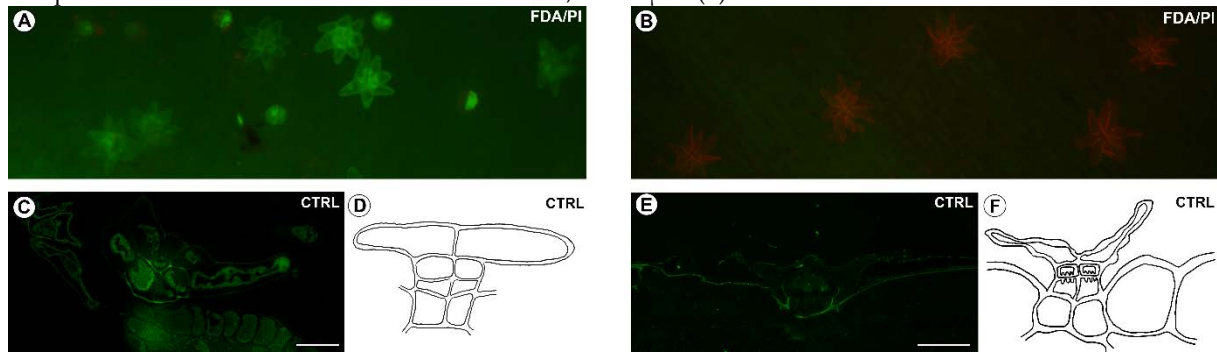

Supplement: s1 [file s1]
